# Supplementary material for: Telomeric TART elements target the piRNA machinery in Drosophila
Source: PubMed Central journal article supplement (PMC7785250; doi:10.1371/journal.pbio.3000689), 2020-12-21

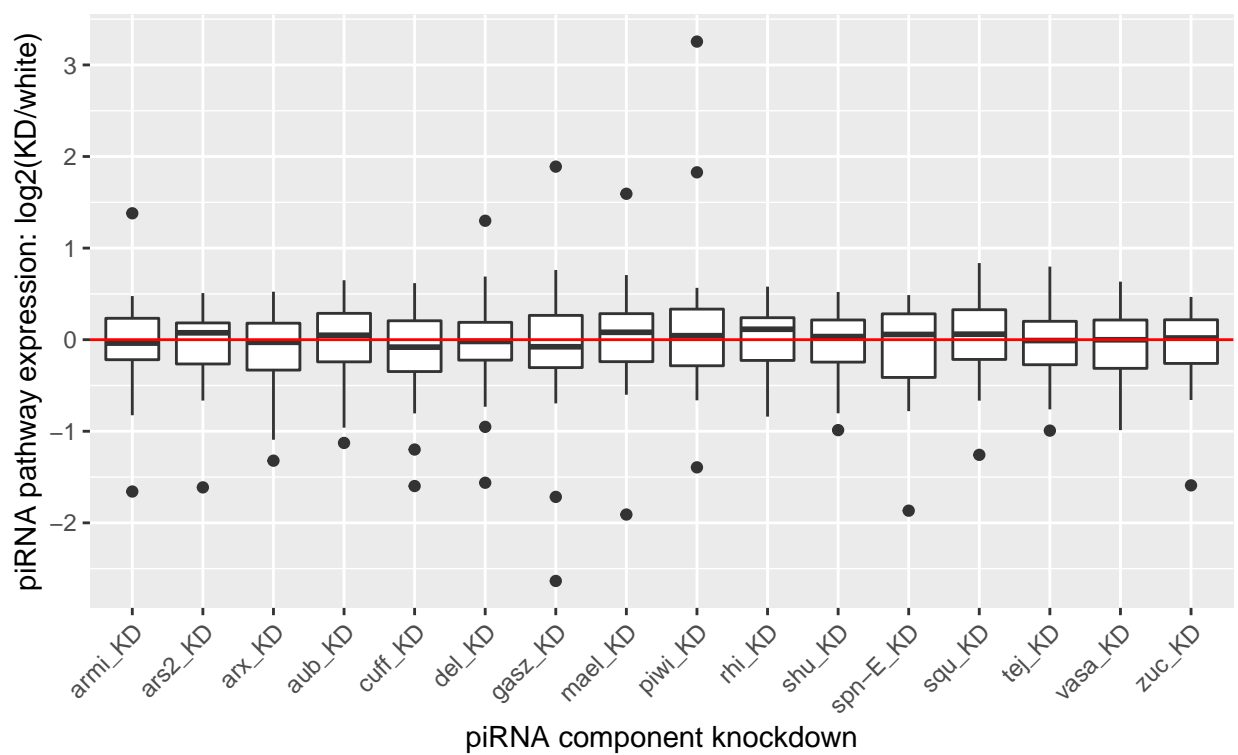

Supplement: pbio.3000689.s010.pdf [file pbio.3000689.s010.pdf]
